# Supplementary material for: Enhancing multiplex genome editing by natural transformation (MuGENT) via inactivation of ssDNA exonucleases
Source: PubMed Central journal article supplement — Nucleic Acids Res. 2017 May 31;45(12):7527–37. doi: 10.1093/nar/gkx496 (PMC5499599; doi:10.1093/nar/gkx496), 2017-05-31
Supplement: gkx496_supp.pdf [file gkx496_supp.pdf]

## SUPPLEMENTARY FIGURES

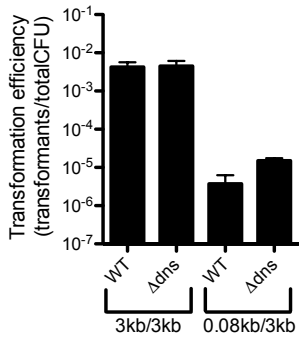

**Fig. S1** – *Dns* does not inhibit natural transformation of tDNA with one small arm of homology. Natural transformation assay of the indicated strains with tDNA containing the indicated length of homology on either side of the mutation. All data are the result of at least three independent biological replicates and are shown as the mean ± SD.

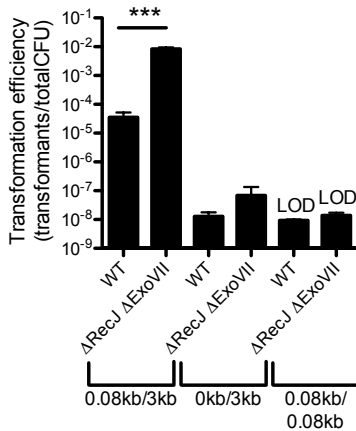

**Fig. S2** – High efficiency transformation requires two arms of homology where at least one arm is long. Natural transformation assay of the indicated strains with tDNA containing the indicated length of homology on either side of the mutation. All data are the result of at least three independent biological replicates and are shown as the mean ± SD. \*\*\* =  $p < 0.001$  and LOD = limit of detection.

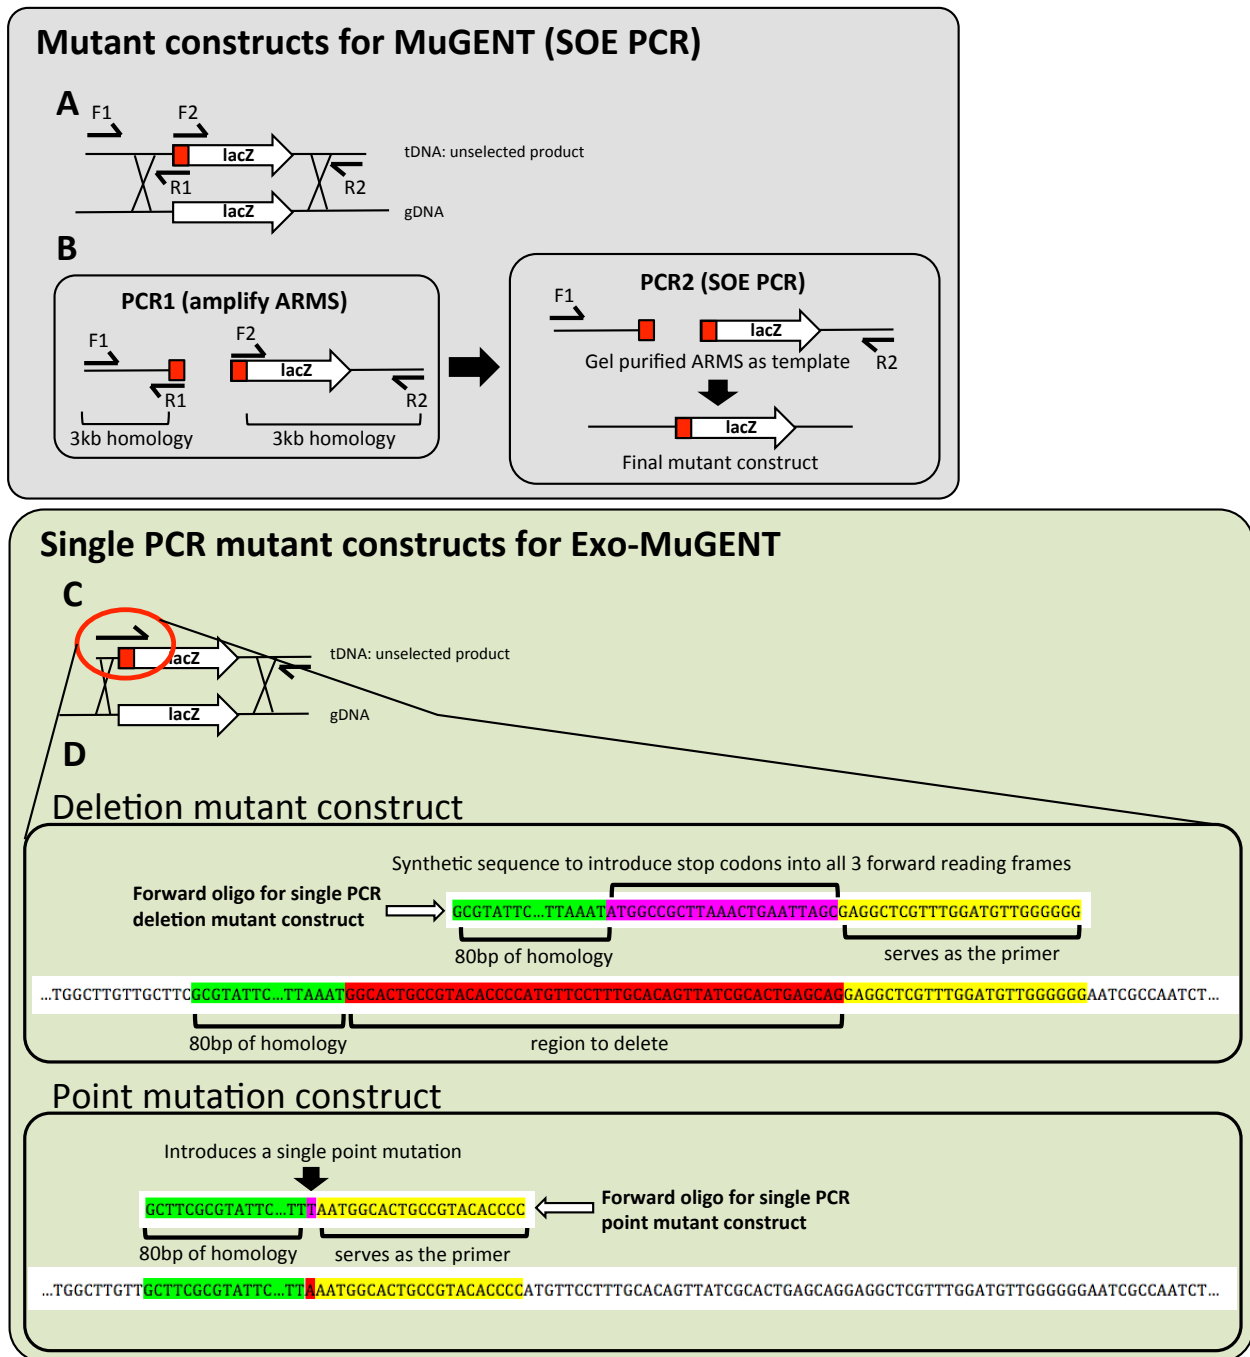

**Fig. S3** – Schematic for generating mutant constructs for MuGENT and Exo-MuGENT. (A and B) Mutant construct generation for classical MuGENT in WT *V. cholerae*. (A) Shows the general overview of how mutant constructs are generated by SOE PCR. (B) Schematic for the two distinct PCR steps required for generating mutant constructs. In the first round of PCR, arms of homology are amplified off of genomic DNA with F1/R1 and F2/R2 oligos as indicated. The R1 and F2 oligos are engineered to contain the mutation of interest (deletion, insertion, and/or point mutation), which are highlighted in red in the schematic. The products from the first PCR are then gel purified and serve as template for a second

PCR reaction. The overlapping ends of the two ARMS allows them to be spliced together and the final product is amplified with the F1 and R2 primers. **(C and D)** Making single PCR mutant constructs for Exo-MuGENT in ssDNA exonuclease mutant strain backgrounds. **(C)** Overview of single PCR mutant constructs. The forward oligo contains (1) a short (80 bp) arm of homology, (2) the mutation being introduced, and (3) a 3' sequence which serves as a primer to amplify the large (3 kb) downstream region of homology as depicted. **(D)** Detailed schematic depicting how forward oligos are designed to make deletions (top) and point mutations (bottom).

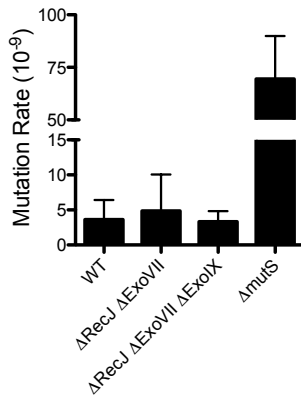

**Fig. S4** – Loss of *recJ* and *exoVII* does not increase mutation rate. Fluctuation analysis for spontaneous resistance to rifampicin was performed to assess the mutation rate of the indicated strains. All data are from at least 10 independent biological replicates and shown as the mean  $\pm$  SD.

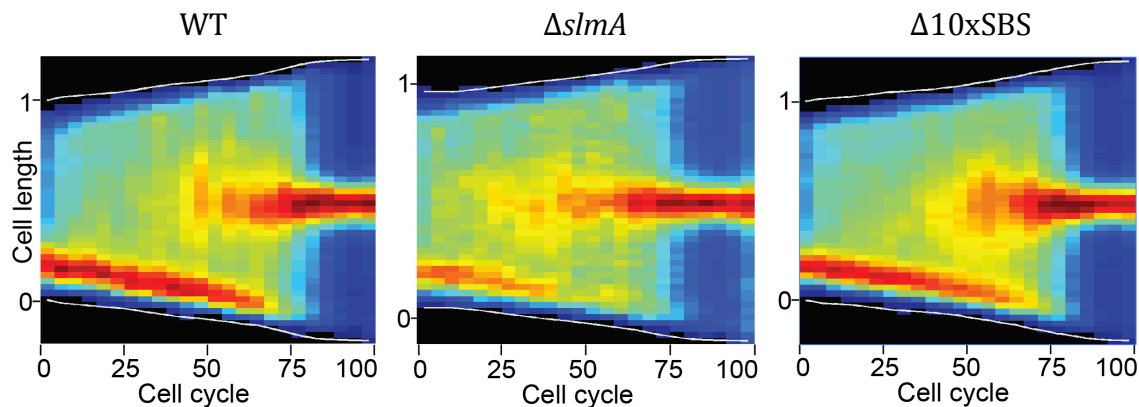

**Fig. S5** – *FtsZ* localization during the cell cycle is largely unchanged in the  $\Delta 10xSBS$  mutant. Cell cycle choreography for FtsZ-RFPT. Dark red and blue colors were assigned to the maximal and minimal fluorescence intensity projections observed at each time point, respectively. This representation highlights changes in the relative distribution of fluorescence along the long cell axis. Data for each sample are the compilation of data from 40 to 80 single cells.

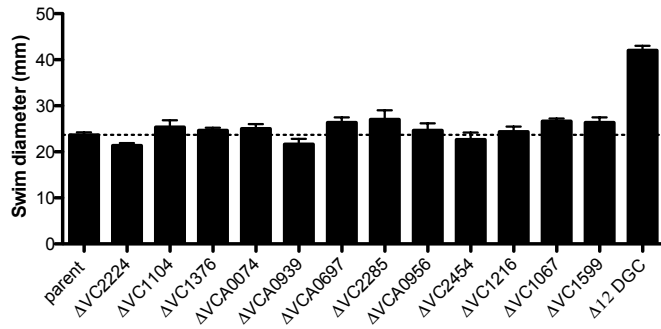

**Fig. S6** – The 12 DGCs targeted act additively or synergistically to reduce swimming motility in *V. cholerae*. Swim assay performed for the indicated strains. All strains are in a  $P_{tac}$ -*tfoX*  $\Delta recJ$   $\Delta exoVII$  parent strain background. Data are the result of at least three independent biological replicates and shown as the mean  $\pm$  SD.

## SUPPLEMENTARY TABLES

**Table S1** – RNA-seq expression analysis of all DGCs in *V. cholerae* during growth in rich medium

| Locus <sup>&amp;</sup> | Gene name | Replicate 1 <sup>§</sup> | Replicate 2 <sup>§</sup> | Replicate 3 <sup>§</sup> | Average expression <sup>#</sup> | Expression rank <sup>*</sup> | Biofilm% | Motility% |
|------------------------|-----------|--------------------------|--------------------------|--------------------------|---------------------------------|------------------------------|----------|-----------|
| VC0072                 |           | 0.155                    | 0.135                    | 0.111                    | 0.134                           | 20                           |          |           |
| VC0130                 |           | 0.182                    | 0.140                    | 0.221                    | 0.181                           | 16                           |          |           |
| VC0398                 |           | 0.278                    | 0.250                    | 0.260                    | 0.263                           | 10                           |          |           |
| VC0653                 | rocS      | 0.378                    | 0.394                    | 0.760                    | 0.510                           | 2                            |          | ↓         |
| VC0658                 |           | 0.084                    | 0.123                    | 0.172                    | 0.126                           | 21                           |          |           |
| VC0703                 | mbaA      | 0.305                    | 0.262                    | 0.207                    | 0.258                           | 11                           |          |           |
| VC0900                 | cdgG      | 0.303                    | 0.379                    | 0.422                    | 0.368                           | 3                            |          |           |
| VC1029                 |           | 0.080                    | 0.072                    | 0.076                    | 0.076                           | 30                           |          |           |
| VC1067                 | cdgH      | 0.289                    | 0.351                    | 0.184                    | 0.275                           | 8                            | ↓        | ↑         |
| VC1104                 | cdgK      | 0.080                    | 0.082                    | 0.059                    | 0.074                           | 32                           | ↓        | ↑         |
| VC1185                 |           | 0.053                    | 0.056                    | 0.068                    | 0.059                           | 37                           |          |           |
| VC1216                 |           | 0.083                    | 0.152                    | 0.690                    | 0.308                           | 5                            |          |           |
| VC1353                 |           | 0.150                    | 0.146                    | 0.206                    | 0.167                           | 18                           |          |           |
| VC1367                 |           | 0.445                    | 0.360                    | 0.273                    | 0.359                           | 4                            |          |           |
| VC1370                 |           | 0.033                    | 0.034                    | 0.049                    | 0.039                           | 39                           |          |           |
| VC1372                 |           | 0.088                    | 0.130                    | 0.145                    | 0.121                           | 23                           |          |           |
| VC1376                 | cdgM      | 0.026                    | 0.072                    | 0.171                    | 0.089                           | 26                           | ↓        |           |
| VC1593                 | acgB      | 0.048                    | 0.029                    | 0.119                    | 0.065                           | 33                           |          |           |
| VC1599                 |           | 0.216                    | 0.246                    | 0.340                    | 0.267                           | 9                            |          |           |
| VC1934                 |           | 0.030                    | 0.023                    | 0.066                    | 0.040                           | 38                           |          |           |
| VC2224                 |           | 0.087                    | 0.070                    | 0.073                    | 0.077                           | 29                           |          |           |
| VC2285                 | cdgL      | 0.318                    | 0.235                    | 0.309                    | 0.287                           | 6                            | ↓        | ↑         |
| VC2370                 |           | 0.032                    | 0.041                    | 0.105                    | 0.059                           | 36                           |          |           |
| VC2454                 | vpvC      | 0.141                    | 0.180                    | 0.248                    | 0.189                           | 14                           | ↓        | ↑         |
| VC2697                 |           | 0.016                    | 0.004                    | 0.042                    | 0.020                           | 41                           |          |           |
| VC2750                 |           | 0.054                    | 0.041                    | 0.139                    | 0.078                           | 28                           |          |           |
| VCA0049                |           | 0.227                    | 0.122                    | 0.227                    | 0.192                           | 13                           |          |           |
| VCA0074                | cdgA      | 0.028                    | 0.038                    | 0.037                    | 0.034                           | 40                           | ↓        |           |
| VCA0080                |           | 0.081                    | 0.121                    | 0.168                    | 0.123                           | 22                           |          |           |
| VCA0165                |           | 0.148                    | 0.095                    | 0.377                    | 0.207                           | 12                           |          |           |
| VCA0217                |           | 0.084                    | 0.134                    | 0.121                    | 0.113                           | 24                           |          |           |
| VCA0557                |           | 0.152                    | 0.085                    | 0.269                    | 0.169                           | 17                           |          |           |
| VCA0560                |           | 0.179                    | 0.154                    | 0.118                    | 0.151                           | 19                           |          |           |
| VCA0697                | cdgD      | 0.590                    | 0.522                    | 0.443                    | 0.519                           | 1                            |          | ↑         |
| VCA0785                | cdgC      | 0.041                    | 0.029                    | 0.110                    | 0.060                           | 34                           |          |           |
| VCA0848                |           | 0.048                    | 0.051                    | 0.126                    | 0.075                           | 31                           |          |           |
| VCA0939                |           | 0.068                    | 0.043                    | 0.128                    | 0.080                           | 27                           |          |           |
| VCA0956                |           | 0.159                    | 0.171                    | 0.220                    | 0.183                           | 15                           |          |           |
| VCA0960                |           | 0.038                    | 0.048                    | 0.092                    | 0.060                           | 35                           |          |           |
| VCA0965                |           | 0.058                    | 0.073                    | 0.174                    | 0.102                           | 25                           |          |           |
| VCA1082                |           | 0.219                    | 0.296                    | 0.319                    | 0.278                           | 7                            |          |           |

<sup>&</sup>The 12 loci highlighted in blue were targeted for inactivation via Exo-MuGENT

<sup>§</sup>Data represent the relative transcript abundance of each gene indicated on the left in three independent biological replicates (see **Methods** for a detailed description on how this analysis was performed)

<sup>#</sup>Average expression is the mean of all three biological replicates.

<sup>\*</sup>Expression of each DGC is indicated on a scale from 1 (highest expression) to 41 (lowest expression)

%Mutants of the genes indicated have previously been observed to display an increase (↑) or decrease (↓) in biofilm formation or motility as indicated (1,2).

**Table S2 – Strains used in this study**

| Strain name in manuscript                                                                    | Genotype and antibiotic resistances                                                                                                 | Description                                                                                                                                                                | Reference / (strain#)          |
|----------------------------------------------------------------------------------------------|-------------------------------------------------------------------------------------------------------------------------------------|----------------------------------------------------------------------------------------------------------------------------------------------------------------------------|--------------------------------|
| <b><i>V. cholerae</i> strains</b>                                                            |                                                                                                                                     |                                                                                                                                                                            |                                |
| WT                                                                                           | E7946 Sm <sup>R</sup>                                                                                                               | Wildtype <i>V. cholerae</i> O1 El Tor strain. The parent strain used to make all <i>V. cholerae</i> mutants in this study                                                  | (3) / (SAD030)                 |
| ΔExoI                                                                                        | Δ <i>exoI</i> ::Kan <sup>R</sup> (i.e. ΔVC1234)                                                                                     | Introduced Δ <i>exoI</i> ::Kan <sup>R</sup> mutation into the wildtype strain background                                                                                   | This study (TND0111 / SAD1505) |
| ΔRecJ                                                                                        | Δ <i>recJ</i> ::Spec <sup>R</sup> (i.e. ΔVC2417)                                                                                    | Introduced Δ <i>recJ</i> ::Spec <sup>R</sup> mutation into the wildtype strain background                                                                                  | This study (TND0109 / SAD1506) |
| ΔExoIX                                                                                       | Δ <i>exoIX</i> ::Kan <sup>R</sup> (i.e. ΔVC0898)                                                                                    | Introduced Δ <i>exoIX</i> ::Kan <sup>R</sup> mutation into the wildtype strain background                                                                                  | This study (TND0110 / SAD1507) |
| ΔExoVII                                                                                      | Δ <i>exoVII</i> ::Carb <sup>R</sup> (i.e. ΔVC0766)                                                                                  | Introduced Δ <i>exoVII</i> ::Carb <sup>R</sup> mutation into the wildtype strain background                                                                                | This study (TND0112 / SAD1508) |
| ΔRecJ ΔExoIX                                                                                 | Δ <i>recJ</i> ::Spec <sup>R</sup> , Δ <i>exoIX</i> ::Kan <sup>R</sup>                                                               | Introduced Δ <i>exoIX</i> ::Kan <sup>R</sup> mutation into the TND0109 strain background                                                                                   | This study (TND0125 / SAD1509) |
| ΔRecJ ΔExoVII                                                                                | Δ <i>recJ</i> ::Spec <sup>R</sup> , Δ <i>exoVII</i> ::Carb <sup>R</sup>                                                             | Introduced Δ <i>exoVII</i> ::Carb <sup>R</sup> mutation into the TND0109 strain background                                                                                 | This study (TND0126 / SAD1510) |
| ΔExoIX ΔExoVII                                                                               | Δ <i>exoIX</i> ::Kan <sup>R</sup> , Δ <i>exoVII</i> ::Carb <sup>R</sup>                                                             | Introduced Δ <i>exoVII</i> ::Carb <sup>R</sup> mutation into the TND0110 strain background                                                                                 | This study (TND0127 / SAD1511) |
| ΔRecJ ΔExoVII ΔExoIX                                                                         | Δ <i>recJ</i> ::Spec <sup>R</sup> , Δ <i>exoVII</i> ::Carb <sup>R</sup> , Δ <i>exoIX</i> ::Kan <sup>R</sup>                         | Introduced Δ <i>exoVII</i> ::Carb <sup>R</sup> and Δ <i>exoIX</i> ::Kan <sup>R</sup> mutations into the TND0109 strain background                                          | This study (TND0118 / SAD1512) |
| <i>P</i> <sub>tac-tfoX</sub> Δ <i>recJ</i> Δ <i>exoVII</i>                                   | <i>P</i> <sub>tac-tfoX</sub> Δ <i>recJ</i> 501bp, Δ <i>exoVII</i> 501bp, ΔVC1807::Kan <sup>R</sup>                                  | MuGENT to introduce <i>P</i> <sub>tac-tfoX</sub> mutation and 501bp deletions into the 5' end of the <i>recJ</i> and <i>exoVII</i> genes in the wildtype strain background | This study (TND0195 / SAD1513) |
| <i>P</i> <sub>tac-tfoX</sub> Δ <i>recJ</i> Δ <i>exoVII</i> Δ <i>mutS</i>                     | <i>P</i> <sub>tac-tfoX</sub> Δ <i>recJ</i> 501bp, Δ <i>exoVII</i> 501bp, Δ <i>mutS</i> 501bp, ΔVC1807::Spec <sup>R</sup>            | Introduced a ~500bp deletion into the 5' end of the <i>mutS</i> gene in the TND0195 strain background via cotransformation                                                 | This study (SAD1252)           |
| <i>P</i> <sub>tac-tfoX</sub> Δ <i>recJ</i> Δ <i>exoVII</i> <i>P</i> <sub>tac-mutL</sub> E32K | <i>P</i> <sub>tac-tfoX</sub> Δ <i>recJ</i> 501bp, Δ <i>exoVII</i> 501bp, ΔVC1807::P <sub>tac-mutL</sub> E32K Spec <sup>R</sup>      | Introduced the ΔVC1807::P <sub>tac-mutL</sub> E32K (Spec <sup>R</sup> -linked to this mutation) into the TND0195 strain background                                         | This study (SAD1308)           |
| <i>P</i> <sub>tac-tfoX</sub> Δ <i>recJ</i> Δ <i>exoVII</i> Δ <i>lacZ</i> :: <i>lacIq</i>     | <i>P</i> <sub>tac-tfoX</sub> Δ <i>recJ</i> 501bp, Δ <i>exoVII</i> 501bp, Δ <i>lacZ</i> :: <i>lacIq</i> , ΔVC1807::Spec <sup>R</sup> | Introduced Δ <i>lacZ</i> :: <i>lacIq</i> mutation into TND0195 via cotransformation                                                                                        | This study (TND0252 / SAD1514) |
| ΔVC2224                                                                                      | <i>P</i> <sub>tac-tfoX</sub> Δ <i>recJ</i> 501bp, Δ <i>exoVII</i>                                                                   | Replaced ~50bp of the 5' end of                                                                                                                                            | This study                     |

|                                 |                                                                                                                                                                                                                                                                                                                                                     |                                                                                                                                         |                                |
|---------------------------------|-----------------------------------------------------------------------------------------------------------------------------------------------------------------------------------------------------------------------------------------------------------------------------------------------------------------------------------------------------|-----------------------------------------------------------------------------------------------------------------------------------------|--------------------------------|
|                                 | 501bp, $\Delta lacZ::lacIq$ ,<br>$\Delta VC1807::Kan^R$ , $\Delta VC2224$                                                                                                                                                                                                                                                                           | $\Delta VC2224$ with a premature stop codon containing sequence in the TND0252 strain background.                                       | (TND0383 / SAD1515)            |
| $\Delta VC1104$                 | $P_{tac-tfoX} \Delta recJ$ 501bp, $\Delta exoVII$<br>501bp, $\Delta lacZ::lacIq$ ,<br>$\Delta VC1807::Kan^R$ , $\Delta VC1104$                                                                                                                                                                                                                      | Replaced ~50bp of the 5' end of $\Delta VC1104$ with a premature stop codon containing sequence in the TND0252 strain background.       | This study (TND0384 / SAD1516) |
| $\Delta VC1376$                 | $P_{tac-tfoX} \Delta recJ$ 501bp, $\Delta exoVII$<br>501bp, $\Delta lacZ::lacIq$ ,<br>$\Delta VC1807::Kan^R$ , $\Delta VC1376$                                                                                                                                                                                                                      | Replaced ~50bp of the 5' end of $\Delta VC1376$ with a premature stop codon containing sequence in the TND0252 strain background.       | This study (TND0385 / SAD1517) |
| $\Delta VCA0074$                | $P_{tac-tfoX} \Delta recJ$ 501bp, $\Delta exoVII$<br>501bp, $\Delta lacZ::lacIq$ ,<br>$\Delta VC1807::Kan^R$ , $\Delta VCA0074$                                                                                                                                                                                                                     | Replaced ~50bp of the 5' end of $\Delta VCA0074$ with a premature stop codon containing sequence in the TND0252 strain background.      | This study (TND0386 / SAD1518) |
| $\Delta VCA0939$                | $P_{tac-tfoX} \Delta recJ$ 501bp, $\Delta exoVII$<br>501bp, $\Delta lacZ::lacIq$ ,<br>$\Delta VC1807::Kan^R$ , $\Delta VCA0939$                                                                                                                                                                                                                     | Replaced ~50bp of the 5' end of $\Delta VCA0939$ with a premature stop codon containing sequence in the TND0252 strain background.      | This study (TND0387 / SAD1519) |
| $\Delta VCA0697$                | $P_{tac-tfoX} \Delta recJ$ 501bp, $\Delta exoVII$<br>501bp, $\Delta lacZ::lacIq$ ,<br>$\Delta VC1807::Kan^R$ , $\Delta VCA0697$                                                                                                                                                                                                                     | Replaced ~50bp of the 5' end of $\Delta VCA0697$ with a premature stop codon containing sequence in the TND0252 strain background.      | This study (TND0388 / SAD1520) |
| $\Delta VC2285$                 | $P_{tac-tfoX} \Delta recJ$ 501bp, $\Delta exoVII$<br>501bp, $\Delta lacZ::lacIq$ ,<br>$\Delta VC1807::Kan^R$ , $\Delta VC2285$                                                                                                                                                                                                                      | Replaced ~50bp of the 5' end of $\Delta VC2285$ with a premature stop codon containing sequence in the TND0252 strain background.       | This study (TND0389 / SAD1521) |
| $\Delta VCA0956$                | $P_{tac-tfoX} \Delta recJ$ 501bp, $\Delta exoVII$<br>501bp, $\Delta lacZ::lacIq$ ,<br>$\Delta VC1807::Kan^R$ , $\Delta VCA0956$                                                                                                                                                                                                                     | Replaced ~50bp of the 5' end of $\Delta VCA0956$ with a premature stop codon containing sequence in the TND0252 strain background.      | This study (TND0390 / SAD1522) |
| $\Delta VC2454$                 | $P_{tac-tfoX} \Delta recJ$ 501bp, $\Delta exoVII$<br>501bp, $\Delta lacZ::lacIq$ ,<br>$\Delta VC1807::Kan^R$ , $\Delta VC2454$                                                                                                                                                                                                                      | Replaced ~50bp of the 5' end of $\Delta VC2454$ with a premature stop codon containing sequence in the TND0252 strain background.       | This study (TND0391 / SAD1523) |
| $\Delta VC1216$                 | $P_{tac-tfoX} \Delta recJ$ 501bp, $\Delta exoVII$<br>501bp, $\Delta lacZ::lacIq$ ,<br>$\Delta VC1807::Kan^R$ , $\Delta VC1216$                                                                                                                                                                                                                      | Replaced ~50bp of the 5' end of $\Delta VC1216$ with a premature stop codon containing sequence in the TND0252 strain background.       | This study (TND0392 / SAD1524) |
| $\Delta VC1067$                 | $P_{tac-tfoX} \Delta recJ$ 501bp, $\Delta exoVII$<br>501bp, $\Delta lacZ::lacIq$ ,<br>$\Delta VC1807::Kan^R$ , $\Delta VC1067$                                                                                                                                                                                                                      | Replaced ~50bp of the 5' end of $\Delta VC1067$ with a premature stop codon containing sequence in the TND0252 strain background.       | This study (TND0393 / SAD1525) |
| $\Delta VC1599$                 | $P_{tac-tfoX} \Delta recJ$ 501bp, $\Delta exoVII$<br>501bp, $\Delta lacZ::lacIq$ ,<br>$\Delta VC1807::Kan^R$ , $\Delta VC1599$                                                                                                                                                                                                                      | Replaced ~50bp of the 5' end of $\Delta VC1599$ with a premature stop codon containing sequence in the TND0252 strain background.       | This study (TND0394 / SAD1526) |
| $\Delta 12$ DGC<br>"unrepaired" | $\Delta VCA0956$ , $\Delta VC1599$ , $\Delta VC2454$ ,<br>$\Delta VC1104$ , $\Delta VCA0939$ ,<br>$\Delta VCA0074$ , $\Delta VC2224$ , $\Delta VC1376$ ,<br>$\Delta VC1067$ , $\Delta VC1216$ , $\Delta VCA0697$ ,<br>$\Delta VC2285$ , $P_{tac-tfoX} \Delta recJ$ 501bp,<br>$\Delta exoVII$ 501bp, $\Delta lacZ::lacIq$ ,<br>$\Delta VC1807::Tm^R$ | Replaced ~50bp of the 5' end of all 12 DGCs indicated with a premature stop codon containing sequence in the TND0252 strain background. | This study (TND0349 / SAD1527) |

|                                                             |                                                                                                                                                                                                                                     |                                                                                                                                                                                           |                                |
|-------------------------------------------------------------|-------------------------------------------------------------------------------------------------------------------------------------------------------------------------------------------------------------------------------------|-------------------------------------------------------------------------------------------------------------------------------------------------------------------------------------------|--------------------------------|
| $\Delta 12$ DGC “repaired”                                  | $\Delta VCA0956, \Delta VC1599, \Delta VC2454, \Delta VC1104, \Delta VCA0939, \Delta VCA0074, \Delta VC2224, \Delta VC1376, \Delta VC1067, \Delta VC1216, \Delta VCA0697, \Delta VC2285, \Delta VC1807::Spec^R$                     | Repaired the $P_{tac-tfoX}, \Delta recJ, \Delta exoVII$ , and $\Delta lacZ::lacIq$ mutations in TND0349.                                                                                  | This study (TND0354 / SAD1528) |
| $\Delta 10xSBS$ parent strain background                    | $\Delta 10xSBS, P_{tac-tfoX} \Delta recJ$ 501bp, $\Delta exoVII$ 501bp, $\Delta lacZ::lacIq, \Delta VC1807::Spec^R$                                                                                                                 | Mutated conserved residues in the 10 highest-affinity SBSs in the TND0252 strain background.                                                                                              | This study (TND0291 / SAD1529) |
| $\Delta 10xSBS$ parent strain background “repaired”         | $\Delta 10xSBS, \Delta VC1807::Spec^R$                                                                                                                                                                                              | Repaired the $P_{tac-tfoX}, \Delta recJ, \Delta exoVII$ , and $\Delta lacZ::lacIq$ mutations in TND0291.                                                                                  | This study (TND0311 / SAD1530) |
| $\Delta 10xSBS$ Ptac-mutL E32K strain background            | $\Delta 10xSBS, P_{tac-tfoX} \Delta recJ$ 501bp, $\Delta exoVII$ 501bp, $\Delta VC1807::P_{tac-mutL}$ E32K $Spec^R, \Delta VCA0692::Carb^R$                                                                                         | Mutated conserved residues in the 10 highest-affinity SBSs in the SAD1308 strain background.                                                                                              | This study (TND0273 / SAD1531) |
| $\Delta 10xSBS$ Ptac-mutL E32K strain background “repaired” | $\Delta 10xSBS, \Delta VC1807::Kan^R$                                                                                                                                                                                               | Repaired the $P_{tac-tfoX}, \Delta recJ, \Delta exoVII, \Delta VC1807::P_{tac-mutL}$ E32K, and $\Delta VCA0692$ mutations in TND0273.                                                     | This study (TND0313 / SAD1532) |
| $\Delta cdgJ$                                               | $\Delta cdgJ::Kan^R$                                                                                                                                                                                                                | Introduced a $cdgJ$ mutation into the WT (SAD030) strain background.                                                                                                                      | This study (TND0411 / SAD1533) |
| $\Delta 12$ DGC $\Delta cdgJ$                               | $\Delta VCA0956, \Delta VC1599, \Delta VC2454, \Delta VC1104, \Delta VCA0939, \Delta VCA0074, \Delta VC2224, \Delta VC1376, \Delta VC1067, \Delta VC1216, \Delta VCA0697, \Delta VC2285, \Delta VC1807::Spec^R, \Delta cdgJ::Kan^R$ | Introduced a $cdgJ$ mutation into the TND0354 strain background.                                                                                                                          | This study (TND0412 / SAD1534) |
| WT $ftsZ$ -RFPT                                             | $\Delta lacZ::(P_{bad::ftsZ-RFPT-zeo})$                                                                                                                                                                                             | Introduced a $P_{bad::ftsZ-RFPT-zeo}$ in place of the chromosomal copy of $lacZ$ into the WT (SAD030) strain background                                                                   | This study                     |
| $\Delta slmA$ $ftsZ$ -RFPT                                  | $\Delta slmA::Kan^R, \Delta lacZ::(P_{bad::ftsZ-RFPT-zeo})$                                                                                                                                                                         | Introduced a $P_{bad::ftsZ-RFPT-zeo}$ in place of the chromosomal copy of $lacZ$ in a $\Delta slmA$ mutant strain background                                                              | This study                     |
| $\Delta 10xSBS$ $ftsZ$ -RFPT                                | $\Delta VC1807::Kan^R, \Delta 10xSBS, \Delta lacZ::(P_{bad::ftsZ-RFPT-zeo})$                                                                                                                                                        | Introduced a $P_{bad::ftsZ-RFPT-zeo}$ in place of the chromosomal copy of $lacZ$ into TND0313                                                                                             | This study                     |
| WT pMLH17                                                   | pMLH17                                                                                                                                                                                                                              | WT strain (SAD030) with pMLH17 (Hsieh <i>et al.</i> unpublished), an Amp <sup>R</sup> arabinose-inducible vector for ectopic expression of $vpsR$ . This vector is derived from pHERD20T. | This study                     |
| $\Delta 12$ DGC pMLH17                                      | $\Delta VCA0956, \Delta VC1599, \Delta VC2454, \Delta VC1104, \Delta VCA0939, \Delta VCA0074, \Delta VC2224, \Delta VC1376, \Delta VC1067, \Delta VC1216, \Delta VCA0697, \Delta VC2285, \Delta VC1807::Spec^R, pMLH17$             | TND0354 with pMLH17 (Hsieh <i>et al.</i> unpublished), an Amp <sup>R</sup> arabinose-inducible vector for ectopic expression of $vpsR$ . This vector is derived from pHERD20T.            | This study                     |
| <b>A. baylyi strains</b>                                    |                                                                                                                                                                                                                                     |                                                                                                                                                                                           |                                |
| WT                                                          | Strain ADP1                                                                                                                                                                                                                         | Wildtype <i>A. baylyi</i> strain used throughout this study                                                                                                                               | (4) / SAD631                   |



|                             |                                                         |                                                                                       |                                |
|-----------------------------|---------------------------------------------------------|---------------------------------------------------------------------------------------|--------------------------------|
| $\Delta$ RecJ               | <i>ΔrecJ::Kan<sup>R</sup></i> (i.e. $\Delta$ ACIAD3500) | Introduced <i>ΔrecJ::Kan<sup>R</sup></i> mutation into the wildtype strain background | This study (TND0166 / SAD1535) |
| $\Delta$ ExoX               | <i>ΔexoX</i> (i.e. $\Delta$ ACIAD2257)                  | Introduced an in-frame <i>ΔexoX</i> mutation into the wildtype strain background      | This study (TND0185 / SAD1536) |
| $\Delta$ RecJ $\Delta$ ExoX | <i>ΔrecJ::Kan<sup>R</sup>, ΔexoX</i>                    | Introduced an in-frame <i>ΔexoX</i> mutation into the TND0166 strain background       | This study (TND0194 / SAD1537) |

**Table S3** – Primers used in this study

| Primer Name                          | Primer Sequence (5'→3')*                           | Description                |
|--------------------------------------|----------------------------------------------------|----------------------------|
| <b>Primers for Mutant constructs</b> |                                                    |                            |
| BBC688                               | TGGATGAGTGCTAAATGATGC                              | <i>Δexol</i> Vc F1         |
| BBC689                               | gtcgacggatccccggaatCATGTGGCTTACCAAATCGC            | <i>Δexol</i> Vc R1         |
| BBC690                               | gaagcagctccagcctacaTGCTAACATCGTTTATTTTACTTGC       | <i>Δexol</i> Vc F2         |
| BBC691                               | AACATGGTAAACAGCACCATC                              | <i>Δexol</i> Vc R2         |
| BBC678                               | TGGATGCCAATCAACATTCCG                              | <i>ΔrecJ</i> Vc F1         |
| BBC679                               | gtcgacggatccccggaatCATACTGTGACAGGCCAAAAG           | <i>ΔrecJ</i> Vc R1         |
| BBC680                               | gaagcagctccagcctacaGAAGCGAAATGATTGAAAACAACG        | <i>ΔrecJ</i> Vc F2         |
| BBC681                               | GATCGCATCCACAATGTTAGC                              | <i>ΔrecJ</i> Vc R2         |
| DOG0190                              | AGAAGAACTCTGTTTTGCATTAGAAC                         | <i>ΔexoIX</i> Vc F1        |
| DOG0191                              | gtcgacggatccccggaatCAAGCGACGAGTTCATGCTTG           | <i>ΔexoIX</i> Vc R1        |
| DOG0192                              | gaagcagctccagcctacaTAAATCCCCCTGATTAGCATC           | <i>ΔexoIX</i> Vc F2        |
| DOG0193                              | TTAACCTGACGTGACCGTG                                | <i>ΔexoIX</i> Vc R2        |
| DOG0185                              | TTCACTTCACCCAGTACACGC                              | <i>ΔexoVII</i> Vc F1       |
| DOG0186                              | gtcgacggatccccggaatCAACGCTGATTCCTCAGACG            | <i>ΔexoVII</i> Vc R1       |
| DOG0187                              | gaagcagctccagcctacaTTAATGGATGGTGAGATTCTCTC         | <i>ΔexoVII</i> Vc F2       |
| DOG0188                              | AGTTTGTAGAGGTTGTTATGGTAC                           | <i>ΔexoVII</i> Vc R2       |
| DOG0219                              | ATAGATGGTGCCTTGCGC                                 | <i>ΔexoVII</i> 501bp Vc F1 |
| DOG0220                              | gctaattcagtttaagcgccatCAACGCTGATTCCTCAGACG         | <i>ΔexoVII</i> 501bp Vc R1 |
| DOG0221                              | atggccgcttaactgaattagcCTGCCTGTAGTGATCTACCCC        | <i>ΔexoVII</i> 501bp Vc F2 |
| DOG0222                              | AAGTTCTCGGTAGTCAAAACC                              | <i>ΔexoVII</i> 501bp Vc R2 |
| BBC1342                              | ATACGTTCCAGGCACTGTTTGG                             | <i>ΔrecJ</i> 501bp Vc F1   |
| BBC1343                              | GCTAATTCAGTTTAAAGCGGCCATCATGCTTGAAAAGAGCCAGC       | <i>ΔrecJ</i> 501bp Vc R1   |
| BBC1344                              | ATGGCCGCTTAAACTGAATTAGCGTGGATGCTATGGTCAACCC        | <i>ΔrecJ</i> 501bp Vc F2   |
| BBC1345                              | TTACGAATCGCAGACACTAGC                              | <i>ΔrecJ</i> 501bp Vc R2   |
| ABD824                               | TTAGCCCCATTGGCGAACTGGG                             | <i>ΔmutS</i> 501bp Vc F1   |
| ABD825                               | GAGTATCTTTGACGTATTGGATCtcatattatactaCATAATCTTATGTC | <i>ΔmutS</i> 501bp Vc R1   |
| ABD826                               | GATAAGCAGCGACATAAGATTATGtagtataatgaGATCCAA TACGTC  | <i>ΔmutS</i> 501bp Vc F2   |
| ABD360                               | AGATCTTGCCTGATGACGCTTTACTC                         | <i>ΔmutS</i> 501bp Vc R2   |
| BBC717                               | AAATAGATTTGGTGACTTTACCTCC                          | $\Delta$ Vc1807 Vc F1      |
| ABD340                               | gtcgacggatccccggaatACGTTTCATTAGTCACTCTATTGTTAACTT  | $\Delta$ Vc1807 Vc R1      |
| ABD341                               | gaagcagctccagcctacaTAGTCGAAAATAAAAAAAGAGGCTCGCCTC  | $\Delta$ Vc1807 Vc F2      |

|         |                                                                                                 |                                                                           |
|---------|-------------------------------------------------------------------------------------------------|---------------------------------------------------------------------------|
| BBC718  | CTTTACGCCTGATTGTCTACAC                                                                          | $\Delta VC1807$ Vc R2                                                     |
| BBC1249 | CCAGCATCTAAACTGTTcTtCACCAACTCCTTGACTAC                                                          | <i>mutL</i> E32K R1                                                       |
| BBC1250 | GTAGTCAAGGAGTTGGTgAgAACAGTTTAGATGCTGG                                                           | <i>mutL</i> E32K F2                                                       |
| BBC791  | caatttcacacaggatcccgggAGGAGGTaacgtaATGACGATTCGAATC                                              | MIDDLE for $P_{tac}$ - <i>mutL</i> E32K F                                 |
| BBC792  | tgtaggctggagctgcttcTCATGAGTGTAATGCTGTAATTG                                                      | MIDDLE for $P_{tac}$ - <i>mutL</i> E32K R                                 |
| ABD342  | ATTTTTTCAGTTGGCCTACAATGCTTTCC                                                                   | UP for $\Delta VC1807::P_{tac}$ - <i>mutL</i> Spec <sup>R</sup> E32K F1   |
| BBC244  | CCCCGGATCCTGTGTGAAATTGTTATCCGC                                                                  | UP for $\Delta VC1807::P_{tac}$ - <i>mutL</i> E32K Spec <sup>R</sup> R1   |
| ABD341  | gaagcagctccagcctacaTAGTCGAAAATAAAAAAAGAGGCTCGCCTC                                               | DOWN for $\Delta VC1807::P_{tac}$ - <i>mutL</i> Spec <sup>R</sup> E32K F2 |
| ABD345  | CTTGCTAACCGTTGGTGTACCAGC                                                                        | DOWN for $\Delta VC1807::P_{tac}$ - <i>mutL</i> Spec <sup>R</sup> E32K R2 |
| DOG0209 | TAGTGGTGGATGACCTTCATG                                                                           | $\Delta recJ$ Ab F1                                                       |
| DOG0210 | gtcgacggatccccggaatCATTTATGGCATCAGTCGTTGC                                                       | $\Delta recJ$ Ab R1                                                       |
| DOG0211 | gaagcagctccagcctacaTAAAAAAATCGCTCATTTGAGCG                                                      | $\Delta recJ$ Ab F2                                                       |
| DOG0212 | AATCAGACCTGCACCAGCTC                                                                            | $\Delta recJ$ Ab R2                                                       |
| DOG0231 | TCAGCCTGCTCTTAATACGC                                                                            | $\Delta exoX$ Ab F1                                                       |
| DOG0232 | gtcgacggatccccggaatCAATCTGATTTTCTTTGCTTACATTG                                                   | $\Delta exoX$ Ab R1                                                       |
| DOG0233 | gaagcagctccagcctacaTAAAATATAGCTCTCACTGACTATTTTC                                                 | $\Delta exoX$ Ab F2                                                       |
| DOG0234 | ATCATGTTGTTGCTTTGCATCG                                                                          | $\Delta exoX$ Ab R2                                                       |
| BBC1388 | ATGCCGATCATATCGGTcAGTGTGTACACACTCCTGTTCCcAatCTatacAcagAAGCATTtTATTCTCGTTGGTGAC                  | SBS29 edit F                                                              |
| BBC1389 | GCTACGAGTAGAAATCATCGC                                                                           | SBS29 edit R                                                              |
| BBC1383 | AAGCCGATAAGAATGAGCGGTTAGCAGGCAAAACCATTGGcGAGCAtcTttTgGCACCGACCAAAATTTATATCAA                    | SBS17 edit F                                                              |
| BBC1384 | CTAGCATGGTGAAAGTCAGTG                                                                           | SBS17 edit R                                                              |
| BBC1393 | GTGATTCAACTCGCAAAACGGGTACGGTTTAGCTAGGTTTa aTctgTTTTtagTtagTATTGGCCTTGTGATAATGG                  | SBS49 edit F                                                              |
| BBC1384 | CTAGCATGGTGAAAGTCAGTG                                                                           | SBS49 edit R                                                              |
| BBC1408 | TTAGGCGCAAGGTCACTTTACCGCTTCAGGCAAGCGGTTcGTtGGaACCCAtTCCTTACTCCATTCACCTTGC                       | SBS5 edit F                                                               |
| BBC1409 | CAAGGTTTTGCGTTTAAAGCG                                                                           | SBS5 edit R                                                               |
| BBC1398 | CTGCAGGCAGTATGATCGCCGATCAAGATCAGGAACGTTTa cTgGcTtTAACgAACCAACTCGCGACCGATC                       | SBS15 edit F                                                              |
| BBC1399 | AAACTACGACAAGTATCTTGCG                                                                          | SBS15 edit R                                                              |
| BBC1412 | TATTGGATTGGGGATCGTTATCAAAGACAAGGCTATGGTA AaGAAGCtTgACgGCGCTGATTTTATTCTGTTTTGAG                  | SBS23 edit F                                                              |
| BBC1413 | ACTATCTTGGTCGAGTTGACC                                                                           | SBS23 edit R                                                              |
| BBC1403 | CAGATAATGTGGTTTTGACTCTTTGTTTCGAGGTTACCGTgt caAAAaGacTctTgAAGTCTGGCATCATTGTAAGTG                 | SBS46 edit F                                                              |
| BBC1404 | TCTCTACCATCAATTCGATCGG                                                                          | SBS46 edit R                                                              |
| BBC1378 | AATCGCCCGACACATCGCGCAGCGAACCATGATCAATAAAa TTcGcgaAaCaAgCAAAGAGTTGATGTTGATGCC                    | SBS56 edit F                                                              |
| BBC1379 | CTGTTGTTACTGGGTATTGGC                                                                           | SBS56 edit R                                                              |
| BBC1373 | TCCATGCGGAAACCGATAGTGAGCGAGATAGCGCATTACGc GAGCAtcTttTgGCGCTTCGTAACCATATTCCG                     | SBS2 edit F                                                               |
| BBC1374 | GAAGTTTTCGGCCAGATAGCG                                                                           | SBS2 edit R                                                               |
| BBC1084 | CAAGTAGGCGCGTAAGTTGGCGGTTTGTGCTGCCACTCATCAC CCGGCATTTTGTACATAAagactcttTtCCATACACCACTTCA TCGTGTG | SBS66 edit F                                                              |

|                             |                                                                                                |                                                                 |
|-----------------------------|------------------------------------------------------------------------------------------------|-----------------------------------------------------------------|
| BBC1085                     | AAAGTGGGTAGCCAGAATTCC                                                                          | SBS66 edit R                                                    |
| DOG0300                     | CGCAGCAAAAAATACAACATACCATTATTCAACGTCTATGg<br>ccgcttaaaactgaattagcTTGATTTCCACCAGCAGTTTAGC       | VC1067 edit F                                                   |
| DOG0301                     | TTATCCCTTCCCAACTAAGCAGC                                                                        | VC1067 edit R                                                   |
| DOG0304                     | CGTGAGTTAGCGGTATAGGCTAAAGAGTTGAGCGCCGAGC<br>ATGgcccgttaaaactgaattagcGATGAGCAGCATCAATCTCTC      | VC1216 edit F                                                   |
| DOG0305                     | TTTGTGAGCATCTGGATGTTGAG                                                                        | VC1216 edit R                                                   |
| DOG0308                     | AAGGTTATGAAAAATGTCTTGGCGTATCCGAAACAAGTGATG<br>gcccgttaaaactgaattagcCCTTTAATGATGAAACATCATGTCCG  | VCA0956 edit F                                                  |
| DOG0309                     | ATCATTCACTTTACGCATATTTCC                                                                       | VCA0956 edit R                                                  |
| DOG0312                     | TTCTATAGTATGCACTCAACGACTTATACATCGAATTATGg<br>ccgcttaaaactgaattagcGTACTTGGTTTTATTCTTACACTG      | VCA0697 edit F                                                  |
| DOG0313                     | AACAAATCCATATTGGCATCATAG                                                                       | VCA0697 edit R                                                  |
| DOG0316                     | ATAAACGCTTACGTTTAGCCCCGAGAGGGTGAGTGCATGg<br>ccgcttaaaactgaattagcTGCGGCCTAAGTTTCTTTTG           | VC1599 edit F                                                   |
| DOG0317                     | TTAGTGAGCTGATCGATGCC                                                                           | VC1599 edit R                                                   |
| DOG0320                     | TTTGTCTAAGTAAAGGTTTATTATGACGATGGTGATATG<br>gcccgttaaaactgaattagcGCGGTGGTGTAGGCTTTTAAATG        | VC2285 edit F                                                   |
| DOG0321                     | AATCACTGTCGCCACTAAAAC                                                                          | VC2285 edit R                                                   |
| DOG0324                     | TAACGATTGGCTAGGTTCCCAAGCCGAAGCAACCGATGg<br>ccgcttaaaactgaattagcAATAGAATTGAAGAGCTTTTTGATAA<br>C | VCA0939 edit F                                                  |
| DOG0325                     | AAACGGTTGCCAGTATAAGC                                                                           | VCA0939 edit R                                                  |
| DOG0328                     | TCACCGAGAGTTAATGGCAACATAGCCAGTACTCGGTATGg<br>ccgcttaaaactgaattagcATGCGCTTCTGTTTTCCACTG         | VC2224 edit F                                                   |
| DOG0329                     | TTCAAGCACGCTTAGACTTAC                                                                          | VC2224 edit R                                                   |
| DOG0332                     | TGGTGGGTTTTTCATTTCTAGAGGTTAGCAGGCAATTATGg<br>ccgcttaaaactgaattagcGTTTTTGTGCTGGCCGCAT           | VC1104 edit F                                                   |
| DOG0333                     | AACATACGAATCGAGCCATC                                                                           | VC1104 edit R                                                   |
| DOG0336                     | GATATTGATATATCACACATCTTCATCATGATTTTTTCATGg<br>ccgcttaaaactgaattagcATTGTGCCCTTGCTGGTAC          | VC1376 edit F                                                   |
| DOG0337                     | AATTTTAGGTAATGCTTGAAGAG                                                                        | VC1376 edit R                                                   |
| DOG0340                     | CCCCTGATCTTACATGCCAAAACACTGCTGATCTTCATGg<br>ccgcttaaaactgaattagcGATTTATCTAAGTCTTACTCTTCGC      | VCA0074 edit F                                                  |
| DOG0341                     | TTATCTTGGGTATTGGTCGC                                                                           | VCA0074 edit R                                                  |
| DOG0344                     | AACGCGAACTTCGCCACTGGTTAATCGCTTGCTGAAGATGg<br>ccgcttaaaactgaattagcATTCCGCGCGGCATACAG            | VC2454 edit F                                                   |
| DOG0345                     | AACCTTCTCACCATCATCAATG                                                                         | VC2454 edit R                                                   |
| BBC1672                     | GATCAATTCCTTTGGCTCGAG                                                                          | $\Delta$ cdgJ F1                                                |
| BBC1673                     | gtcgacggatccccggaatCATGGTGTCTCAAAGGGTTG                                                        | $\Delta$ cdgJ R1                                                |
| BBC1674                     | gaagcagctccagcctacaCGATTAATTTAGTGATAAGTTAATGC<br>ACC                                           | $\Delta$ cdgJ F2                                                |
| BBC1675                     | CATACTCCCCGACAATTGCAC                                                                          | $\Delta$ cdgJ R2                                                |
| <b>Primers for MASC-PCR</b> |                                                                                                |                                                                 |
| ABD725                      | GAAGCAGCTCCAGCCTACA                                                                            | F oligo to detect all resistance cassette or in-frame mutations |
| ABD969                      | ATGGCCGCTTAAACTGAATTAGC                                                                        | F oligo to detect all 501 bp or 50 bp mutations                 |
| BBC692                      | GAACAGCAAAATCATGTAACG                                                                          | R to detect <i>exoI</i> mutation in Vc                          |
| BBC682                      | AAGAGTTGAAACAATATATGGAATGG                                                                     | R to detect <i>recJ</i> mutation in Vc                          |
| DOG0194                     | TTCCGCGATTGGATGCTG                                                                             | R to detect <i>exoIX</i> mutation in Vc                         |
| DOG0189                     | TCGATGAATTATGTGATACAACGC                                                                       | R to detect <i>exoVII</i> mutation in Vc                        |
| DOG0223                     | AGGATGCTGTTTATCAAGCTTGTG                                                                       | R to detect <i>exoVII</i> 501bp mutation in                     |

|         |                          |                                                 |
|---------|--------------------------|-------------------------------------------------|
|         |                          | Vc                                              |
| BBC1346 | CAGTTCCATCAGTTTtagGC     | R to detect <i>recJ</i> 501bp mutation in Vc    |
| ABD848  | AGGGTATCAATGCCGTGACG     | R to detect <i>mutS</i> 501bp mutation in Vc    |
| BBC030  | ACCAAACAATAAACGAGTAATGC  | R to detect VC1807 mutation in Vc               |
| BBC1251 | AGTCAAGGAGTTGGTgagg      | F to detect <i>mutL</i> E32K                    |
| BBC1252 | GGTTAAGCGTGAGACTGAGC     | R to detect <i>mutL</i> E32K                    |
| BBC1150 | GCACTTGGTTTACAAGGTTATGAC | R to detect $\Delta$ <i>recJ</i> mutation in Ab |
| DOG0235 | AAGCATCTGGTAAAGTCAATAAG  | R to detect $\Delta$ <i>exoX</i> mutation in Ab |
| BBC1676 | TTTAACGCTGAGCGCTCGAC     | R to detect $\Delta$ <i>cdgJ</i> mutation       |
| BBC1390 | CTGTTCCcAatCTatacAcag    | Detect SBS29 edited F                           |
| BBC1391 | AACAGCGGTATTTTTATTGCG    | Detect SBS29 R                                  |
| BBC1385 | CCATTGGcGAGCAtcctt       | Detect SBS17 edited F                           |
| BBC1386 | GATTTGCGCCGATGACCCATG    | Detect SBS17 R                                  |
| BBC1395 | CTAGGTTTaaTctgGTTtagTtag | Detect SBS49 edited F                           |
| BBC1396 | AGTGAATAAAGCAATCCGCAAG   | Detect SBS49 R                                  |
| BBC1411 | CGCTGTTTtagCCCGCATTTTC   | Detect SBS5 edited F                            |
| BBC1410 | AAGGAaTGGGTtCCaAtg       | Detect SBS5 R                                   |
| BBC1400 | AGGAACGTTTtacTgGttt      | Detect SBS15 edited F                           |
| BBC1401 | GAAGTGTCTACACGCCAG       | Detect SBS15 R                                  |
| BBC1414 | GGCTATGGTAAaGAAGttt      | Detect SBS23 edited F                           |
| BBC1415 | CCTAATGGGTAACCTAACTCGTG  | Detect SBS23 R                                  |
| BBC1405 | ACCGTGtcaAAAaGaccct      | Detect SBS46 edited F                           |
| BBC1406 | GACCGGGACAAATGCTTGAG     | Detect SBS46 R                                  |
| BBC1380 | ATGATCAATAAAaTTcGcGcaa   | Detect SBS56 edited F                           |
| BBC1381 | CTCGATGATCTCTTACTGCG     | Detect SBS56 R                                  |
| BBC1375 | CATTACGcGAGCAtcctt       | Detect SBS2 edited F                            |
| BBC1376 | GTCGGCTTGAATCGCGAC       | Detect SBS2 R                                   |
| BBC1086 | GGCATTTTGTACATAAGacttctt | Detect SBS66 edited F                           |
| BBC1087 | AATGTTGACGGTGGACGCG      | Detect SBS66 R                                  |
| DOG0302 | TGACGTATTCAATTTCAAGGTTG  | Detect VC1067 edit R                            |
| DOG0306 | ATGAAGTGCTGAAATGCCG      | Detect VC1216 edit R                            |
| DOG0310 | CAAAGGAACTGGTGTCACTG     | Detect VCA0956 edit R                           |
| DOG0314 | ATTGAGCCACAATTTGCTGG     | Detect VCA0697 edit R                           |
| DOG0318 | AGAGTGAGGTTTGATCACTAAACC | Detect VC1599 edit R                            |
| DOG0322 | TTTCTTCGGTTCGAATGAAGGG   | Detect VC2285 edit R                            |
| DOG0326 | AGAGTCAGAGGGTTAGCATAG    | Detect VCA0939 edit R                           |
| DOG0330 | TGTAGTGGTAGTAATGACCGG    | Detect VC2224 edit R                            |
| DOG0334 | TGATCACTGAGCGATAAGGCC    | Detect VC1104 edit R                            |
| DOG0338 | GCATATCGAGATCTTGTTCCATG  | Detect VC1376 edit R                            |
| DOG0342 | CAAGCAGTAGCGGTTCAAG      | Detect VCA0074 edit R                           |
| DOG0346 | ACGCTGGCTAACTTAACCG      | Detect VC2454 edit R                            |

## SUPPLEMENTARY REFERENCES

1. Liu, X., Beyhan, S., Lim, B., Linington, R.G. and Yildiz, F.H. (2010) Identification and characterization of a phosphodiesterase that inversely regulates motility and biofilm formation in *Vibrio cholerae*. *J Bacteriol*, **192**, 4541-4552.
2. Townsley, L. and Yildiz, F.H. (2015) Temperature affects c-di-GMP signalling and biofilm formation in *Vibrio cholerae*. *Environ Microbiol*, **17**, 4290-4305.
3. Miller, V.L., DiRita, V.J. and Mekalanos, J.J. (1989) Identification of *toxS*, a regulatory gene whose product enhances *toxR*-mediated activation of the cholera toxin promoter. *J Bacteriol*, **171**, 1288-1293.
4. Juni, E. and Janik, A. (1969) Transformation of *Acinetobacter calco-aceticus* (*Bacterium anitratum*). *J Bacteriol*, **98**, 281-288.
